# Supplementary material
Source: Elsevier journal article supplement (https://www.sciencedirect.com/science/article/pii/S1853002819300254)
Supplement: mmc1 [file S1853002819300254:mmc1.pdf]

## APÉNDICE 1. Planilla de recolección de datos

| Datos Filiatorios                  |         |                                       |                       |
|------------------------------------|---------|---------------------------------------|-----------------------|
| Historia Clínica                   |         | Escolaridad                           |                       |
| Sexo                               |         | Nacionalidad                          |                       |
| Edad                               |         | Provincia                             |                       |
|                                    |         |                                       |                       |
| Internación                        |         |                                       |                       |
| Motivo de internación:             |         |                                       |                       |
| Fecha de ingreso:                  |         | Fecha de Egreso:                      |                       |
| Sala General                       |         | UTI/UCO:                              |                       |
|                                    |         |                                       |                       |
| Reacciones Adversas Medicamentosas |         |                                       |                       |
| Droga                              |         | Familia de la Droga:                  |                       |
| Laboratorio:                       |         | Código ATC                            |                       |
| Indicación Principal               |         |                                       |                       |
| Dosis                              |         | Frecuencia                            | V. de administración: |
| Fecha de inicio de Droga:          |         | Fecha de discontinuación de la Droga: |                       |
| Nº de Dosis:                       |         | Intoxicación (Si - No)                |                       |
|                                    | RAM 1º: | RAM 2º:                               |                       |
| Sistema/Órgano                     |         |                                       |                       |
| Comienzo (DD/MM/AA)                |         |                                       |                       |
| Finalización (DD/MM/AA)            |         |                                       |                       |
| Días de RAM                        |         |                                       |                       |
| CIE-10                             |         |                                       |                       |
| Causalidad:                        |         |                                       |                       |
| Puntaje Naranja                    |         |                                       |                       |
| Seria/No Seria                     |         |                                       |                       |
| Tipo RAM                           |         |                                       |                       |
| Inesperada                         |         |                                       |                       |
| Reexposición                       |         |                                       |                       |

|                                                                      |  |                    |                       |
|----------------------------------------------------------------------|--|--------------------|-----------------------|
| ¿Disminución o desaparición?                                         |  |                    |                       |
| Motivo de internación (Si/No)                                        |  |                    |                       |
| Prolongó internación (Si /No)                                        |  |                    |                       |
| Notificación a la ANMAT                                              |  |                    |                       |
| <b>En caso de haber sido secundaria a Interacción farmacológica:</b> |  |                    |                       |
| Droga:                                                               |  | I. Farmacocinética |                       |
| Laboratorio:                                                         |  | I. Farmacodinámica |                       |
| Dosis                                                                |  | Frecuencia         | Vía de administración |
|                                                                      |  |                    |                       |

|                                |                             |
|--------------------------------|-----------------------------|
| <b>Antecedentes Personales</b> |                             |
| <b>Alergias</b>                | <b>Neurológicos</b>         |
|                                |                             |
| <b>Cardiológicos</b>           | <b>Oftalmológico</b>        |
|                                |                             |
| <b>Dermatológicos</b>          | <b>Oncológicos</b>          |
|                                |                             |
| <b>Endocrinológicos</b>        | <b>Otorrinolaringología</b> |
|                                |                             |
| <b>Gastrointestinales</b>      | <b>Psiquiátricos</b>        |
|                                |                             |
| <b>Ginecológicos</b>           | <b>Reumatológicos</b>       |
|                                |                             |
| <b>Hábitos</b>                 | <b>Respiratorio</b>         |
|                                |                             |
| <b>Hematológicos</b>           | <b>Quirúrgicos</b>          |
|                                |                             |
| <b>Infectológico</b>           | <b>Traumatológicos</b>      |
|                                |                             |
| <b>Nefrourológicos</b>         | <b>Otros</b>                |
|                                |                             |

| Medicación Habitual |         |
|---------------------|---------|
| Polimedicación:     | Si - No |
|                     |         |

| Estudios Complementarios: |
|---------------------------|
|                           |

| Comentarios |
|-------------|
|             |

## APÉNDICE 2. Algoritmo de Naranjo

| Pregunta                                                                                                               | Si | No | No se sabe |
|------------------------------------------------------------------------------------------------------------------------|----|----|------------|
| 1. ¿Existen informes previos concluyentes acerca de esta reacción?                                                     | +1 | 0  | 0          |
| 2. El evento adverso, ¿apareció después de que se administrara el fármaco sospechoso?                                  | +2 | -1 | 0          |
| 3. La reacción adversa, ¿mejoró al interrumpirse el tratamiento o cuando se administró un antagonista específico?      | +1 | 0  | 0          |
| 4. ¿Reapareció la reacción adversa cuando se volvió a administrar el fármaco?                                          | +2 | -1 | 0          |
| 5. ¿Hay otras causas (distintas al propio fármaco) que puedan por sí mismas haber ocasionado la reacción?              | -1 | +2 | 0          |
| 6. ¿Reapareció la reacción cuando se administró un placebo?                                                            | -1 | +1 | 0          |
| 7. ¿Se ha detectado el fármaco en sangre (o en otros fluidos) en una concentración cuya toxicidad sea conocida?        | +1 | 0  | 0          |
| 8. ¿Aumentó la gravedad de la reacción al aumentarse la dosis o disminuyó al reducirla?                                | +1 | 0  | 0          |
| 9. ¿Había sufrido el paciente una reacción similar al mismo fármaco o a fármacos análogos en alguna exposición previa? | +1 | 0  | 0          |
| 10. ¿Se confirmó el acontecimiento adverso mediante pruebas objetivas?                                                 | +1 | 0  | 0          |
| Puntaje total                                                                                                          |    |    |            |
